# Supplementary material for: Alterations of Fatty Acid Profile May Contribute to Dyslipidemia in Chronic Kidney Disease by Influencing Hepatocyte Metabolism
Source: PubMed Central journal article supplement (PMC6566623; doi:10.3390/ijms20102470), 2019-05-18
Supplement: ijms-20-02470-s001.pdf [file ijms-20-02470-s001.pdf]

# **Alterations of Fatty Acid Profile May Contribute to Dyslipidemia in Chronic Kidney Disease by Influencing Hepatocyte Metabolism**

**Aleksandra Czumaj<sup>1</sup>, Tomasz Śledziński<sup>1,\*</sup>, Juan-Jesus Carrero<sup>2</sup>, Piotr Stepnowski<sup>3</sup>,  
Malgorzata Sikorska-Wisniewska<sup>4</sup>, Michal Chmielewski<sup>4</sup> and Adriana Mika<sup>1,3</sup>**

<sup>1</sup> Department of Pharmaceutical Biochemistry, Faculty of Pharmacy, Medical University of Gdansk, 80-211 Gdansk, Poland; aczumaj@gumed.edu.pl (A.C.); adriana.mika@ug.edu.pl (A.M.)

<sup>2</sup> Medical Epidemiology and Biostatistics (MEB), Karolinska Institutet, SE-171 77 Stockholm, Sweden; Juan.Jesus.Carrero@ki.se

<sup>3</sup> Department of Environmental Analysis, Faculty of Chemistry, University of Gdansk, 80-308 Gdansk, Poland; piotr.stepnowski@ug.edu.pl

<sup>4</sup> Department of Nephrology, Transplantology and Internal Medicine, Faculty of Medicine, Medical University of Gdansk, 80-214 Gdansk, Poland; gosia.sikorska@gmail.com (M.S.-W.); chmiel@gumed.edu.pl (M.C.)

\* Correspondence: tomasz.sledzinski@gumed.edu.pl; Tel.: +48583491479; Fax: +48583491465

Received: 11 April 2019; Accepted: 17 May 2019; Published: date

**Table S1.** The patients subjective evaluation of frequency of consumption of selected products rich in mono- and polyunsaturated fatty acids (the scale is 0-6; 6—very often consumed; 1—very rarely consumed; 0— not consumed). Results presented as mean  $\pm$  SEM. \*—statistically significant compared to healthy control at  $p < 0.05$

|              | Healthy control | CKD 1-2         | CKD3a           | CKD3b           | CKD 4-5         | HD               | PD              | Tx              | Source of           |
|--------------|-----------------|-----------------|-----------------|-----------------|-----------------|------------------|-----------------|-----------------|---------------------|
| Salty snacks | 1.93 $\pm$ 0.17 | 1.72 $\pm$ 0.31 | 1.52 $\pm$ 0.13 | 1.38 $\pm$ 0.12 | 1.53 $\pm$ 0.13 | 1.36 $\pm$ 0.13  | 1.63 $\pm$ 0.17 | 1.55 $\pm$ 0.17 | MUFA, n-6 PUFA      |
| Eggs         | 3.23 $\pm$ 0.11 | 3.10 $\pm$ 0.17 | 3.17 $\pm$ 0.12 | 3.04 $\pm$ 0.12 | 3.21 $\pm$ 0.16 | 2.82 $\pm$ 0.21  | 3.85 $\pm$ 0.16 | 3.14 $\pm$ 0.11 | n-6 PUFA            |
| Oil          | 4.00 $\pm$ 0.15 | 3.59 $\pm$ 0.15 | 3.52 $\pm$ 0.27 | 3.35 $\pm$ 0.21 | 3.83 $\pm$ 0.20 | 3.41 $\pm$ 0.22  | 3.52 $\pm$ 0.17 | 3.43 $\pm$ 0.18 | MUFA, n-6 PUFA      |
| Butter       | 3.79 $\pm$ 0.23 | 3.92 $\pm$ 0.11 | 4.09 $\pm$ 0.30 | 3.69 $\pm$ 0.31 | 3.68 $\pm$ 0.36 | 3.95 $\pm$ 0.36  | 3.77 $\pm$ 0.29 | 3.81 $\pm$ 0.31 | MUFA                |
| Margarine    | 2.90 $\pm$ 0.33 | 2.36 $\pm$ 0.17 | 2.65 $\pm$ 0.37 | 2.04 $\pm$ 0.28 | 1.72 $\pm$ 0.32 | 2.43 $\pm$ 0.40  | 2.73 $\pm$ 0.32 | 2.62 $\pm$ 0.39 | n-3 PUFA, n-6 PUFA  |
| Lard         | 1.83 $\pm$ 0.14 | 1.67 $\pm$ 0.27 | 1.65 $\pm$ 0.17 | 1.58 $\pm$ 0.17 | 1.68 $\pm$ 0.21 | 1.91 $\pm$ 0.23  | 1.41 $\pm$ 0.13 | 1.73 $\pm$ 0.16 | MUFA                |
| Avocado      | 1.59 $\pm$ 0.15 | 1.46 $\pm$ 0.24 | 1.48 $\pm$ 0.18 | 1.12 $\pm$ 0.08 | 1.50 $\pm$ 0.23 | 1.14 $\pm$ 0.09  | 1.74 $\pm$ 0.22 | 1.45 $\pm$ 0.22 | MUFA, n-6 PUFA      |
| Olives       | 2.07 $\pm$ 0.20 | 1.49 $\pm$ 0.13 | 1.52 $\pm$ 0.16 | 1.32 $\pm$ 0.11 | 1.39 $\pm$ 0.18 | 1.27 $\pm$ 0.14  | 1.67 $\pm$ 0.21 | 1.64 $\pm$ 0.19 | MUFA, n-6 PUFA      |
| Legumes      | 2.53 $\pm$ 0.15 | 2.24 $\pm$ 0.14 | 2.22 $\pm$ 0.16 | 2.14 $\pm$ 0.18 | 2.37 $\pm$ 0.17 | 2.16 $\pm$ 0.22  | 2.12 $\pm$ 0.16 | 2.23 $\pm$ 0.15 | n-3 PUFA            |
| Nuts         | 2.63 $\pm$ 0.18 | 2.56 $\pm$ 0.12 | 2.52 $\pm$ 0.23 | 1.80 $\pm$ 0.16 | 2.32 $\pm$ 0.30 | 1.59 $\pm$ 0.17* | 2.27 $\pm$ 0.21 | 2.59 $\pm$ 0.23 | MUFA, n-3 PUFA, n-6 |

|           |             |             |             |             |             |             |             |             |                |
|-----------|-------------|-------------|-------------|-------------|-------------|-------------|-------------|-------------|----------------|
|           |             |             |             |             |             |             |             |             | PUFA           |
| Seeds     | 2.14 ± 0.16 | 2.21 ± 0.15 | 1.91 ± 0.21 | 1.68 ± 0.23 | 2.00 ± 0.24 | 1.55 ± 0.17 | 2.26 ± 0.27 | 2.14 ± 0.26 | MUFA, n-3 PUFA |
| Oily fish | 2.63 ± 0.14 | 2.62 ± 0.15 | 2.50 ± 0.17 | 2.60 ± 0.14 | 2.84 ± 0.17 | 2.23 ± 0.16 | 2.30 ± 0.13 | 2.25 ± 0.21 | n-3 PUFA       |

**Table S2.** Primer Sequences. ACC—acetyl-coenzyme A carboxylase, FASN—fatty acid synthase, SCD1—stearoyl-CoA desaturase, ELOVL6—fatty acid elongase 6, DGAT1—diacylglycerol O-acyltransferase 1, MTPP—microsomal triglyceride transfer protein, ApoB—apolipoprotein B, ApoA1—apolipoprotein A1, SREBP1—sterol regulatory element-binding protein 1.

| Primer Name | Forward Sequence (5`-3`) | Reverse Sequence (5`-3`) |
|-------------|--------------------------|--------------------------|
| ACC         | GCCTGACTTTTGATCCGACC     | GTTATCCCCAAACCCAGGCA     |
| FASN        | CTCGTTGAAGAACGCATCCA     | CGCTCGGCATGGCTATCT       |
| SCD1        | AAGAGTGTGTTCTGTTGCCACTT  | GGTAGTTGTGGAAGCCCTC      |
| ELOVL6      | CAAAGCACCCGAAGTAGGAG     | TGGTGATACCAGTGCAGGAA     |
| DGAT1       | GCATCACCACACACCAGTTC     | TCGCCTGCAGGATTCTTTAT     |
| MTPP        | ACAAGCTCACGTACTCCACTG    | TCCTCCATAGTAAGGCCACATC   |
| ApoB        | CCTGATGGAACAGATTCAAGA    | TGGATCATCAGTGATGGCTTT    |
| ApoA1       | GCCTTGGGAAAACAGCTAAACC   | AGCTTGCTGAAGGTGGAGGTC    |
| SREBP1      | CGGAACCATCTTGGCAACA      | GCCGGTTGATAGGCAGCTT      |

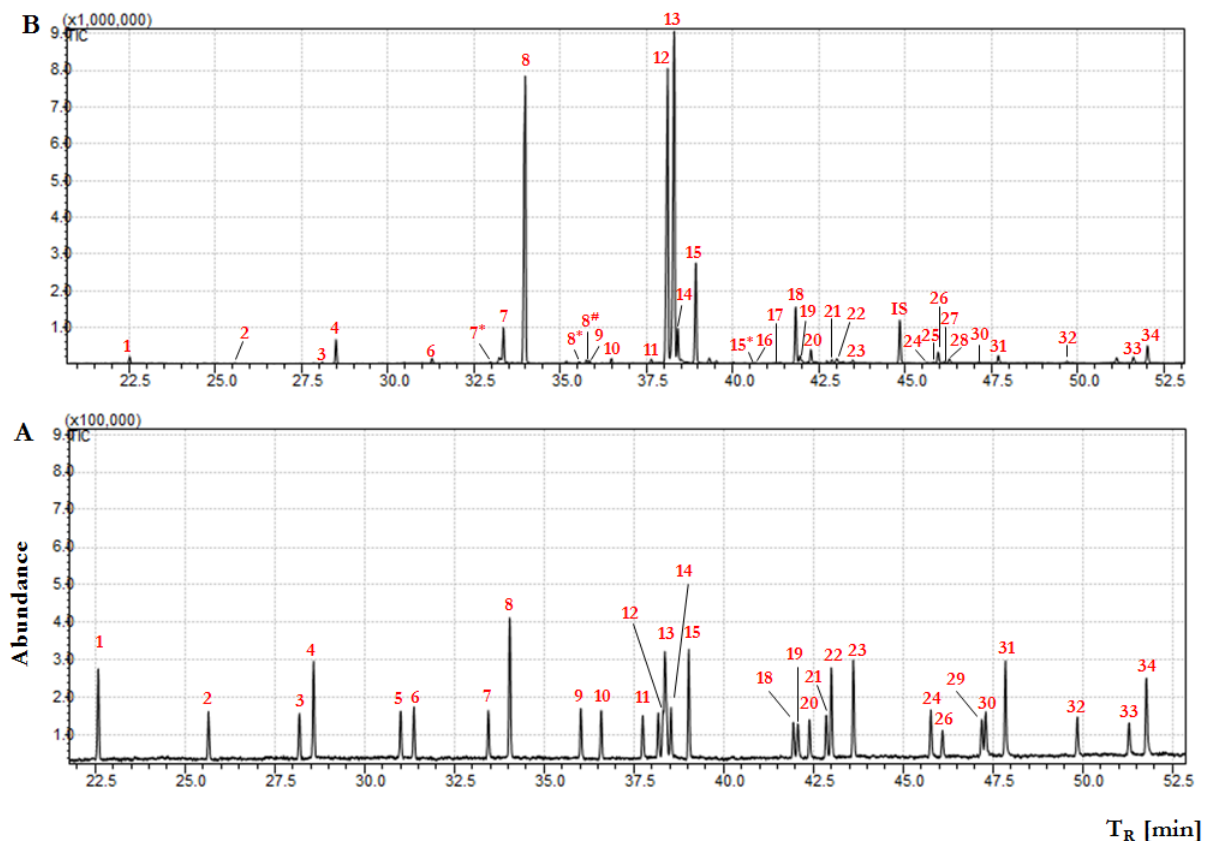

**Figure S1.** GCMS chromatogram of total ion current of the FAME Supelco® mixture (A) and FAME of CKD patient (B).

1—C12:0; 2—C13:0; 3—C14:1(9c); 4—C14:0; 5—C15:1(10c); 6—C15:0; 7\*—iso-C16:0; 7—C16:1(9c); 8\*—iso-C17:0; 8#—anteiso-C17:0; 8—C16:0; 9—C17:1(10c); 10—C17:0; 11—C18:3n-3(9c,12c,15c);

12—C18:2n-6(9c,12c); 13—C18:1(9c); 14—C18:1(9t); 15—C18:0; 15\*—anteiso-C19:0; 16—C19:1(10c); 17—C19:0; 18—C20:4n-6(5c,8c,11c,14c); 19—C20:5n-3(5c,8c,11c,14c,17c); 20—C20:3n-6(8c,11c,14c); 21—C20:2n-6(11c,14c); 22—C20:1(11c); 23—C20:0; IS—iso-C21:0; 24—C21:0; 25—C22:5n-6(4c,7c,10c,13c,16c); 26—C22:6n-3(4c,7c,10c,13c,16c,19c); 27—C22:4n-6(7c,10c,13c,16c); 28—C22:5n-3(7c,10c,13c,16c,19c); 29—C22:2n-6(13c,16c); 30—C22:1(13c); 31—C22:0; 32—C23:0; 33—C24:1(15c); 34—C24:0.

\*—*iso* form of branched chain fatty acids, not present in FAME Supelco® mixture

#—anteiso form of branched chain fatty acids, not present in FAME Supelco® mixture

marked in red in figure legend—fatty acids not present in FAME Supelco® mixture.
